# Supplementary material for: Spermidine Attenuates Oxidative Stress-Induced Apoptosis via Blocking Ca2+ Overload in Retinal Pigment Epithelial Cells Independently of ROS
Source: PubMed Central journal article supplement (PMC7866386; doi:10.3390/ijms22031361), 2021-01-29
Supplement: ijms-22-01361-s001.pdf [file ijms-22-01361-s001.pdf]

**Supplementary Table S1. Primary and secondary antibodies used for immunoblotting.**

| <b>Antibodies</b>        | <b>Supplier</b>                                         | <b>Item No.</b> | <b>Dilution</b> |
|--------------------------|---------------------------------------------------------|-----------------|-----------------|
| $\beta$ -actin           | Santa Cruz Biotechnology, Inc.<br>(Santa Cruz, CA, USA) | sc-1615         | 1:2,000         |
| Bad                      | Santa Cruz Biotechnology, Inc.                          | sc-8044         | 1:500           |
| Bax                      | Santa Cruz Biotechnology, Inc.                          | sc-4780         | 1:500           |
| Bcl-2                    | Santa Cruz Biotechnology, Inc.                          | sc-7382         | 1:500           |
| Cdc2                     | Santa Cruz Biotechnology, Inc.                          | sc-54           | 1:1,000         |
| Cdk2                     | Santa Cruz Biotechnology, Inc.                          | sc-6248         | 1:1,000         |
| Cyclin A                 | Santa Cruz Biotechnology, Inc.                          | sc-239          | 1:1,000         |
| Cyclin B1                | Santa Cruz Biotechnology, Inc.                          | sc-245          | 1:1,000         |
| Cytochrome C             | Santa Cruz Biotechnology, Inc.                          | sc-7159         | 1:1,000         |
| DR4                      | Santa Cruz Biotechnology, Inc.                          | sc-7863         | 1:1,000         |
| DR5                      | Santa Cruz Biotechnology, Inc.                          | sc-166624       | 1:1,000         |
| HO-1                     | Merck Millipore<br>(Burlington, MA, USA)                | 374090          | 1:1,000         |
| $\gamma$ H2AX            | Cell Signaling Technology<br>(Beverly, MA, USA)         | #9718           | 1:1,000         |
| Keap1                    | Bioss Antibodies<br>(Woburn, MA, USA)                   | bs3648          | 1:1,000         |
| p16                      | Santa Cruz Biotechnology, Inc.                          | sc-1661         | 1:1,000         |
| p27                      | Cell Signaling Technology                               | #3686           | 1:1,000         |
| p53                      | Cell Signaling Technology                               | #2524           | 1:1,000         |
| TRAIL                    | Santa Cruz Biotechnology, Inc.                          | sc-8440         | 1:1,000         |
| VDAC                     | Santa Cruz Biotechnology, Inc.                          | sc-390996       | 1:1,000         |
| goat anti-mouse IgG-HRP  | Santa Cruz Biotechnology, Inc.                          | sc-2005         | 1:1,500         |
| goat anti-rabbit IgG-HRP | Santa Cruz Biotechnology, Inc.                          | sc-2004         | 1:1,500         |
